# Supplementary material for: Biological nitrogen fixation of natural and agricultural vegetation simulated with LPJmL 5.7.9
Source: Copernicus journal article supplement (doi:10.5194/egusphere-2023-2946), 2024-02-22
Supplement: Supplementary file 1 [file egusphere-2023-2946-supplement.pdf]

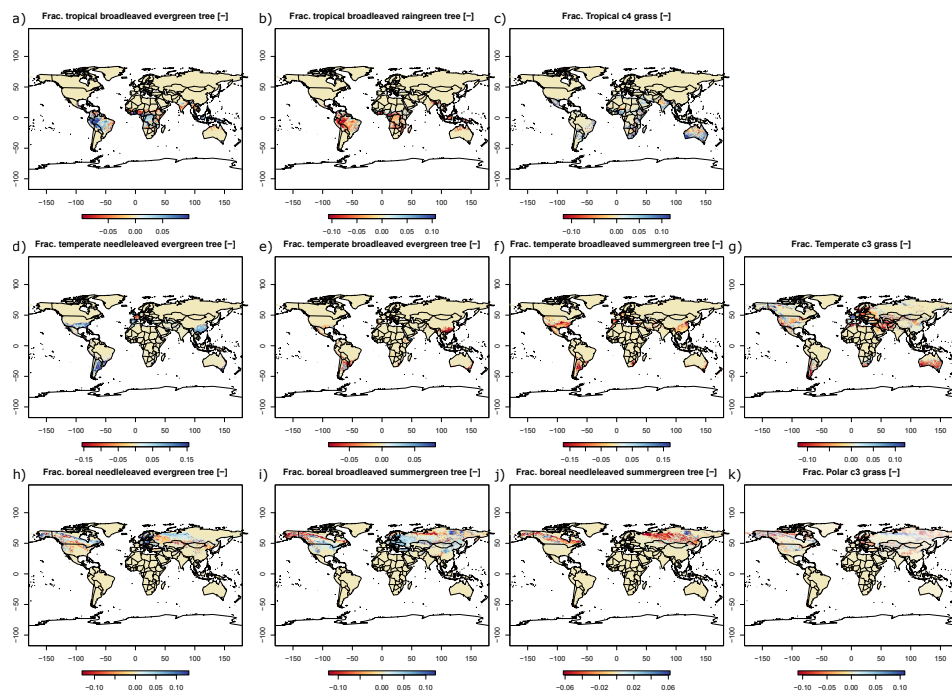

Figure S1: Difference of foliage projective cover in  $\text{m}^2 \text{m}^{-2}$  between the C-costly and the Original BNF approach for dynamic land use simulation and each plant functional type (PFT).

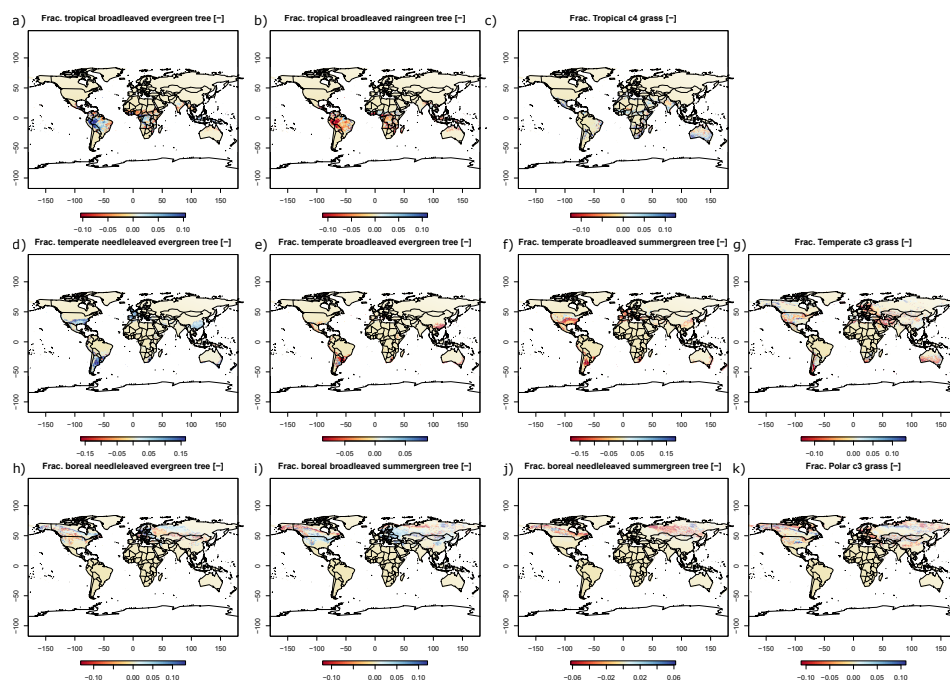

Figure S2: Difference of foliage projective cover in  $\text{m}^2 \text{m}^{-2}$  between the C-costly and the Original BNF approach for potential natural vegetation simulation and each plant functional type (PFT).

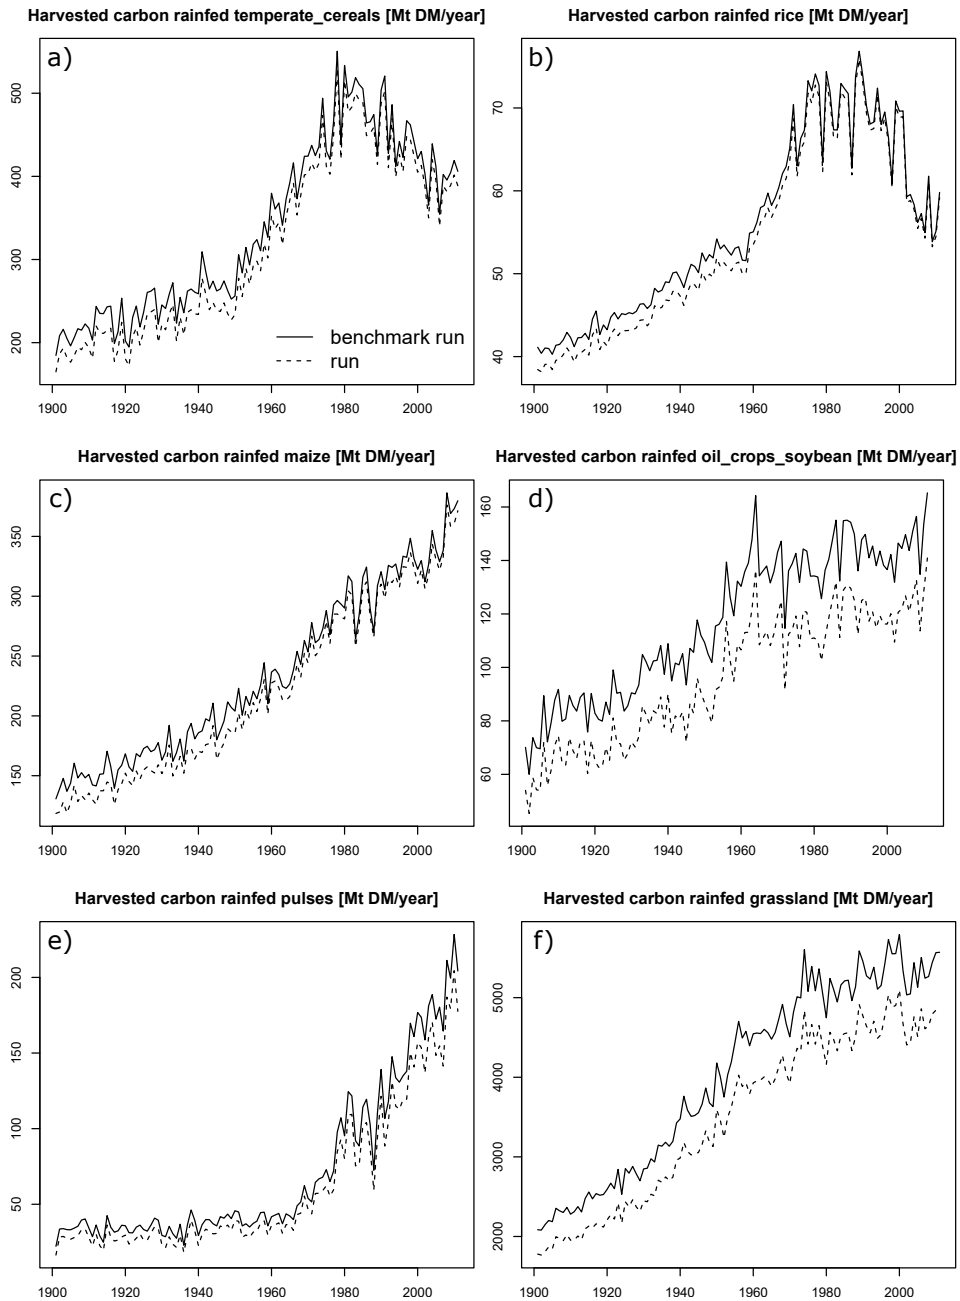

Figure S3: Global sums of harvested carbon from 1901 to 2011 for rainfed temperate cereals (a), rice (b), maize (c), soybean (d), pulses (e) and managed grasslands (f)

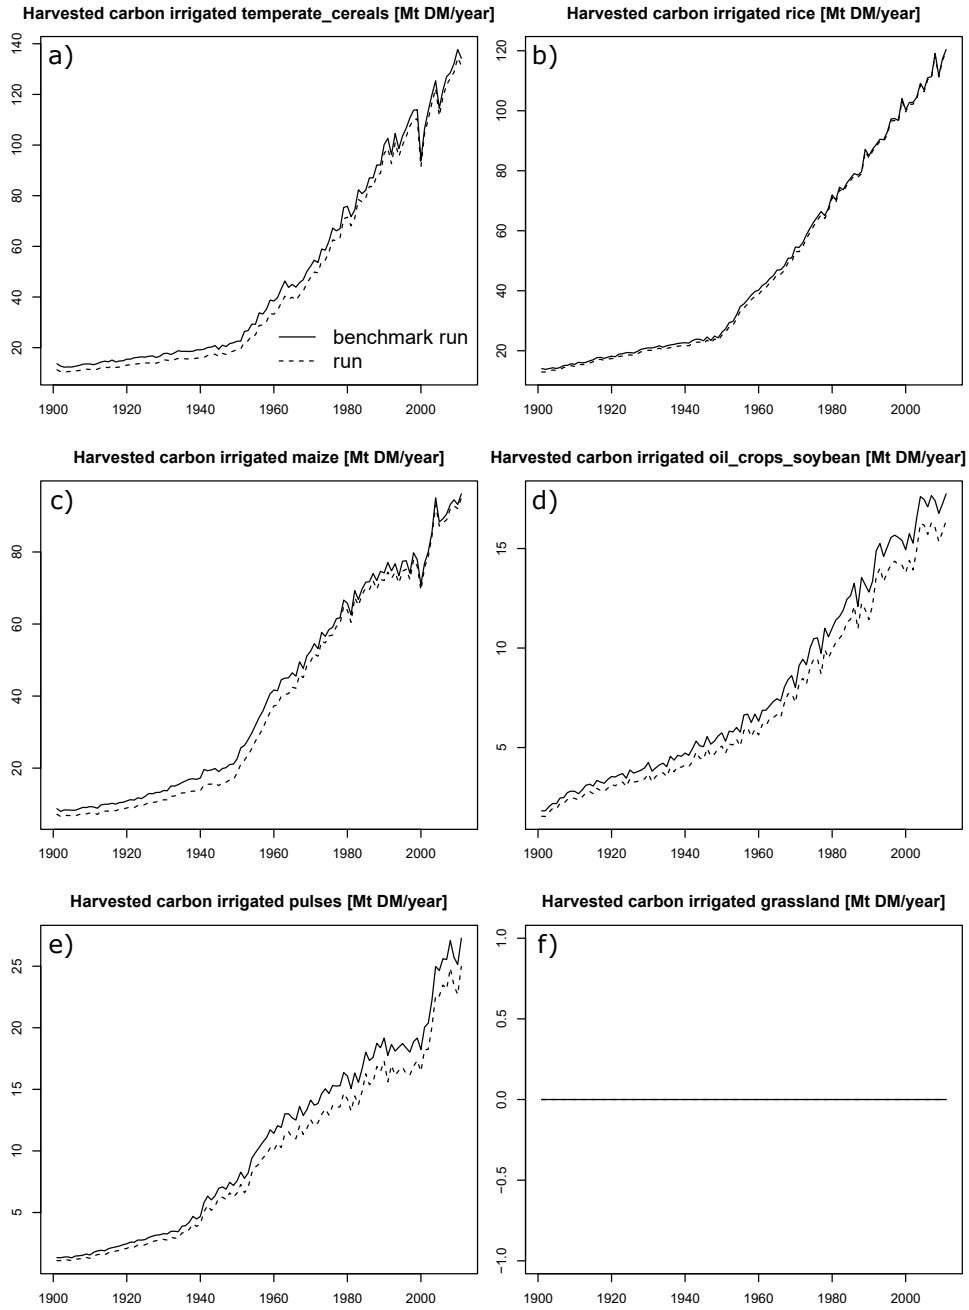

Figure S4: Global sums of harvested carbon from 1901 to 2011 for irrigated temperate cereals (a), rice (b), maize (c), soybean (d), pulses (e) and managed grasslands (f)

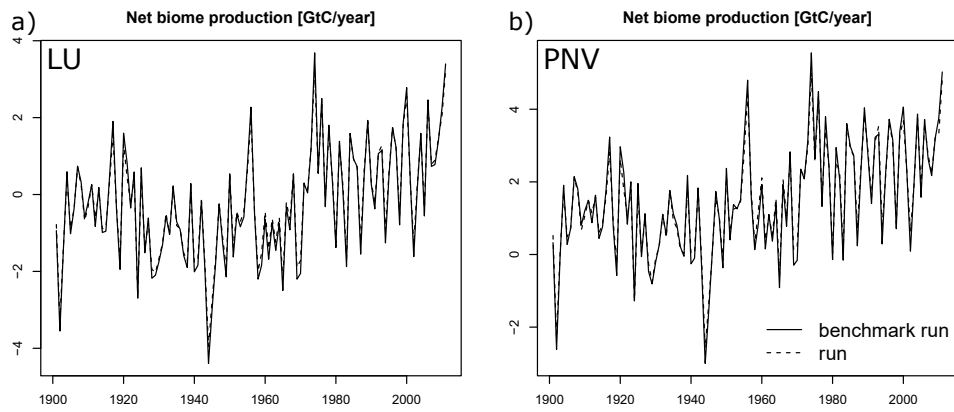

Figure S5: Global sum of net biome production from 1901 until 2011 for the dynamic land use (LU) (a) and potential natural vegetation (PNV) simulation (b)
